# Supplementary material for: Photobiomodulation therapy for children’s eye and vision conditions
Source: Research Square preprint supplement (doi:10.21203/rs.3.rs-7903395/v1), 2025-11-11
Supplement: Supplementary file 1 [file d10c0e53a445121669609019.xlsx]

## Sheet: Supplementary Table 1
Study ID	Title	First Author	Country in which study was conducted	Year of study	Funder/COI	Aim of study	Study design	Start date	Total number of participants enrolled	Total Completing Study	Target eye condition	Target eye condition - Category	Study environment	Age range of participants	Name of intervention Intervention 1	Device used Intervention 1	Wavelength Intervention 1	Irradiance (W/cm2) Intervention 1	Power (mW) Intervention 1	Type of light (continuous, pulsed) Intervention 1	Exposure duration Intervention 1	Administrations per day Intervention 1	Other comments Intervention 1	Name of intervention Intervention 2	Device used Intervention 2	Wavelength Intervention 2	Irradiance (W/cm2) Intervention 2	Power (mW) Intervention 2	Type of light (continuous, pulsed) Intervention 2	Exposure duration Intervention 2	Administrations per day Intervention 2	Other comments Intervention 2	Intervention(s) and controls:	Name of intervention Control (if any)	Device used Control (if any)	Wavelength Control (if any)	Irradiance (W/cm2) Control (if any)	Type of light (continuous, pulsed) Control (if any)	Exposure duration Control (if any)	Administrations per day Control (if any)	Other comments Control (if any)	Name of outcome (for example axial length, quality of life) Primary Outcome		Method of aggregation, f.ex. mean, median Primary Outcome	Outcome measurement technology/tool (f.ex. optical biometry, questionnaire) Primary Outcome	Principal/primary timepoint, f.ex. 12 months Primary Outcome	Reported result of controls f.ex. value of mean/median, SD, CI Primary Outcome	Reported result of intervention 1, f.ex. value of mean/median, SD, CI Primary Outcome	Reported result of intervention 2 f.ex. value of mean/median, SD, CI Primary Outcome
MYOPIA STUDIES
Zhu 2024	Safety of repeated low-level red-light therapy for children with myopia	Mengxia Zhu	China	2022	Funded by the Provincial Natural Science Foundation of Hubei (No. 2021CFB342). No conflicts of interest reported.	To investigate the safety of repeated low-level red-light therapy (RLRLT) in children with myopia by evaluating changes in axial length (AL), spherical equivalent refraction (SER), retinal function, contrast sensitivity, and OCT-based photoreceptor reflectivity.	Cohort study	2022-02-01	115	108	Myopia (SER-0.50 D to-6.00 D)	Myopia	Hospital	3-16 years	Repeated Low-Level Red-Light Therapy (RLRLT) + SVS	Eyerising (Suzhou Xuanjia Optoelectronics Technology)	650 ± 10 nm		2.0 mW (0.29 mW through a 4 mm pupil)	Continuous	3 minutes per session	Twice daily, minimum 4 hours apart, 5 days/week												Repeated Low-Level Red-Light Therapy (RLRLT) + SVS								Axial length (AL)	Change in AL	Mean	Optical biometry	3, 6, and 12 months	+0.132 mm (3M), +0.245 mm (6M), +0.452 mm (12M)	-0.10 mm (3M),-0.075 mm (6M),-0.049 mm (12M)
Zhou 2024	Efficacy of Different Powers of Low-Level Red Light in Children for Myopia Control	Wen Zhou	China	2022	Supported by grants from Xuzhou Medical Leading Talent Training Project and affiliated foundations. Authors report no commercial interest.	To compare the efficacy and safety of three different power levels of low-level red light (LLRL) therapy‚Äî0.37 mW, 0.60 mW, and 1.20 mW‚Äîfor myopia control in children.	Randomised controlled trial	2022-04-01	200	177	Myopia (SE ‚â§-0.50 D, astigmatism ‚â§-2.50 D)	Myopia	Hospital	6 to 15 years	LLRL at 0.37 mW + SVS	Sky-n1201 (Beijing Ming Ren Shi Kang Science & Technology Co., Ltd.)	650 nm		0.37 ± 0.02 mW		3 minutes per session	Twice daily, ‚â•4 hours apart		LLRL at 0.60 mW + SVS	Sky-n1201 (Beijing Ming Ren Shi Kang Science & Technology Co., Ltd.)	650 nm		0.60 ± 0.2 mW,		3 minutes per session	Twice daily, ‚â•4 hours apart			LLRL at 1.20 mW + SVS	Sky-n1201 (Beijing Ming Ren Shi Kang Science & Technology Co., Ltd.)	650 nm			3 minutes per session	Twice daily, ‚â•4 hours apart		Axial Length (AL)	Change in AL	Mean ± SD, 95% CI	Axial Length (AL)	6 months	Control: +0.27 mm (95% CI: +0.22 to +0.33)	0.37 mW: +0.04 mm (95% CI:-0.01 to +0.08)	0.60 mW: 0.00 mm (95% CI:-0.05 to +0.05)
Zhou 2022	Low-intensity, long-wavelength red light slows the progression of myopia in children: an Eastern China-based cohort	Lei Zhou	China	2019-2020	Supported by the Science and Technology Program of Ningbo, China (Grant nos. 2020Y55 and 2020AS0081). No conflicts of interest reported.	To determine the effect of low-intensity, long-wavelength red light ther-apy (LLRT) on the inhibition of myopia progression in children	Non-randomised experimental study	2019-12-01	161 children	105	Myopia (SER <-1.00 D)	Myopia	Hospital	3-14 years	Low-Level Red Light Therapy (LLRT) + SVS	Desktop light therapy device (Optoelectronic Co., Vyoptics)	635nm		0.4 mW	Continuous	3 minutes	Twice a day	Single-vision distance spectacles (SVS)											SVS only, no phototherapy								Cycloplegic Spherical equivalent refraction		Mean ± SD	Autorefractor (KR-1; Topcon, top-con.com)	9 months	-0.94+/-0.13	0.22+/-0.17 p value <0.001
Zhou 2023	Photobiomodulation therapy retarded axial length growth in children with myopia: evidence from a 12-month randomized controlled trial evidence	Lei Zhou	China	2021-2023	Funded by the Science and Technology Program of Ningbo, China, and Xuzhou Medical University. Authors declare no conflicts of interest.	To determine whether photobiomodulation (PBM) therapy can retard ocular axial length (AL) in children with myopia.	Randomised controlled trial	2021-02-01	50	35	Myopia (SER ‚â§-0.75 D)	Myopia	Home	8-12 years	: PBM therapy + single-vision spectacles (SVS)	LD-A (Jilin Londa Optoelectronics Technology)	650 ± 10 nm	0.35 ± 0.02 mW/cm≤		Continous	3 minutes per session	Twice daily, ‚â•4 hours apart	Illumination of 400 lux											SVS only								Axial Length (AL)	Change in AL	Mean (SD)	IOLMaster 500	12 months	+0.48 ± 0.16 mm	-0.02 ± 0.11 mm
Zhang 2024	Efficacy of repeated low-level red-light therapy in the prevention and control of myopia in children	Hao Zhang	China	2022-2023	Funded by the Capital Health Research and Development of Special (Ying Jie 2022-1-1081). Authors report no conflicts of interest.	To assess how different factors (age, gender, baseline refractive error) influence the effectiveness of repeated low-level red-light (RLRL) therapy for myopia control in children.	Non-randomised experimental study	2022-06-01	336	336	Myopia and low hyperopia	Myopia	Home	6 to 16 years	Repeated Low-Level Red-Light Therapy (RLRL)	Head-mounted, Class I laser (Model YF020A, Hunan EnVan Technology)	650 nm		0.29 over 4mm pupil Output power of 1.44 mW	Continuous	3 minutes	Twice daily, ‚â•4 hours apart	Spectacles or corneal reshaping lenses used based on clinical need																			Axial length (AL)	Change in AL	Mean(SD)	Optical biometry	3 months		-0.031 ± 0.103 mm
Yu 2024	Axial Length Shortening after Combined Repeated Low-Level Red-Light Therapy in Poor Responders of Orthokeratology in Myopic Children	Mengting Yu	China	2021-2022	Funded by National Natural Science Foundation of China and Guangdong Provincial Science & Technology Program. Authors declared no conflicts of interest.	To investigate the efficacy and safety of ortho-k and RLRL on myopia control in poor responders of ortho-k with at least 12 months. Herein, we reported the safety and effect of the combination therapy for 12 months.	Cohort study	2020-01-01	100 (1 eye each)	100	Myopia in children with axial elongation ‚â•0.30 mm/year while on orthokeratology	Myopia	Home	7 to 15 years	Orthokeratology + RLRL (OK-RLRL)	Eyerising (Suzhou Xuanjia Optoelectronics)	650 ± 10 nm		0.29 mW (through 4 mm pupil)	Continuous	3 minutes	Twice daily, minimum 4-hour interval, 7 days per week	overnight orthokeratology lens wear											Orthokeratology (OK) only	CRT, Euclid, and DreamLite				Overnight OK lenses worn ‚â•7 hours/night			Axial Length	Change in AL	Mean(SD)	IOLMaster 500 (Carl Zeiss)	12 months	Phase 1 OK only 0.45 ± 0.16 Phase 2 (OK control only) -0.10 ± 0.16 mm	Phase 1 (OK only) 0.43 ± 0.17 mm, P = 0.53 Phase 2 (OK plus RLRL) 0.30 ± 0.19 mm, P < 0.001
Yang 2023	Immediate Effect in the Retina and Choroid after 650 nm Low-Level Red Light Therapy in Children	Weiming Yang	China	2021	Supported by various Chinese national and regional science foundations (listed in detail in full text). Authors report no conflicts of interest.	To evaluate the immediate (short-term) effects of a single session of low-level red light therapy (LLRLT) on retinal and choroidal perfusion and thickness in children.	Non-randomised experimental study	2021-08-01	25	25	General pediatric population without myopia control treatment	Myopia	Hospital	6-12 years	Single-session Low-Level Red-Light Therapy (LLRLT)	650 nm LLRLT device from Hunan New Vision Medical Technology	650 ± 10 nm		0.16 mW through a 4 mm pupil		3 minutes per session	One-time application only												Contralateral eye not exposed to red light (non-LLRLT eye)							light shield worn	Retinal foveal perfusion density		Mean ± SD	(SS- OCT and OCTA) system (TowardPi BMizar, TowardPi Medical Technology, Beijing, ChinaSS	5 mins and 1 hour	1 hour vs 5 mins -0.78±0.86 p 0.3513 1 hour vs baseline: 0.94±0.92 p 0.2967 5 mins versus baseline: 0.54±0.65 p0.3947	1 hour vs 5 mins -2.62±0.86 p 0.0031 1 hour vs baseline: -0.15±0.92 0.8646 5 mins versus baseline: -0.48±0.64 0.4409
Xuan 2023	Longitudinal Changes in Choroidal Structure Following Repeated Low-Level Red-Light Therapy for Myopia Control: Secondary Analysis of a Randomized Controlled Trial	Meng Xuan	China	2023	Supported by the Fundamental Research Funds of the State Key Laboratory of Ophthalmology and the National Natural Science Foundation of China. M. He and Z. Zhu are listed as inventors on related patents and are shareholders in Eyerising Ltd.	To assess longitudinal changes in detailed choroidal structure (luminal area, stromal area, total choroidal area, and choroidal vascularity index) following 12 months of repeated low-level red-light therapy (RLRL) in myopic children, compared to single-vision spectacle (SVS) controls.	Randomised controlled trial	2019-07-01	162 with available OCT data	143 used for secondary choroidal analysis	Myopia (SER-1.00 D to-5.00 D)	Myopia	Hospital	8 to 13 years	Repeated Low-Level Red-Light (RLRL) Therapy + SVS	Eyerising (Suzhou Xuanjia Optoelectronics)	650+/-10nm			Continuous	3 minutes	2x/day, 5 days/week, at least 4 hours apart												Single vision spectacles (SVS) only, worn full time								Changes in choroidal structure luminal area (LA) stromal area (SA) total choroidal area (TCA) choroidal vascularity index (CVI)		Adjusted means with 95% CI	Swept-source OCT (DRI OCT Triton, Topcon)	12 months	LA:-18.78 √ó 10≥ Œºm≤ (95% CI:-26.16 to-11.40) SA:-7.29 √ó 10≥ Œºm≤ (95% CI:-10.58 to-4.00) TCA:-26.03 √ó 10≥ Œºm≤ (95% CI:-36.37 to-15.68) CVI:-0.47% (95% CI:-0.76% to-0.17%)	LA: +11.70 √ó 10≥ Œºm≤ (95% CI: 4.14 to 19.26) SA: +3.92 √ó 10≥ Œºm≤ (95% CI: 0.56 to 7.27) TCA: +15.61 √ó 10≥ Œºm≤ (95% CI: 5.02 to 26.20) CVI: +0.21% (95% CI:-0.09% to +0.51%)
Xu 2024	Repeated Low-Level Red Light Therapy for Myopia Control in High Myopia Children and Adolescents: A Randomized Clinical Trial	Yan Xu	China	2021-2022	Supported by the Clinical Research Program of the Shanghai Municipal Commission of Health and Family Planning; device support from Eyerising Ltd. Authors report no proprietary or commercial conflicts	To evaluate the efficacy and safety of repeated low-level red light (RLRL) therapy for controlling high myopia progression in children and adolescents.	Randomised controlled trial	2021-02-01	192	188	High myopia (SER ‚â§-4.0 D)	Myopia	Other: Hospital tests and Home RLRL	6 to 16 years	RLRL + SVS	Eyerising International	650nm		0.29 mW with a pupil diameter of 4 mm	Continuous	3 minutes	Twice daily, ‚â•4 hours apart, 7 days/week	7 days per week 1600 lux											SVS								Axial length (AL) change	Change in AL	Adjusted mean difference with 95% CI	IOLMaster 700 (Carl Zeiss)	12 months	+0.34 mm (95% CI: +0.30 to +0.39 mm)	-0.06 mm (95% CI:-0.10 to-0.02 mm)
Xiong 2024	Effectiveness of low-level red light for controlling progression of Myopia in children and adolescents	Yinghui Xiong	China	2022	This work was supported by the Xuzhou Medical Leading Talent Training Project	To evaluate the effectiveness of low-level red light (LRL) therapy in controlling myopia progression in children and adolescents.	Randomised controlled trial	2022-03-01	73	72	Myopia (SER between-6.00 D and-0.50 D)	Myopia	Other: RLR at Home	6-14 years	LRL therapy + single vision spectacles (SVS)	desktop light therapy device (Yishiliang [Hunan Yuan- liang health technology Co., LTD. Hunan, China]	650nm		0.9 mW, an extended source subtending 3.6‚ó¶ input power of 0.178 mW for a pupil size of 4 mm	Continuous	3 minutes per session	Twice daily, minimum 4-hour interval	Illuminance of 700 lux											Fully corrected SVS worn continuously without other interventions								Axial length	Change in AL	Mean	ocular biometer (Nidek Inc.,Japan	6 months	0.22 (0.19, 0.25)	-0.02 (-0.07, 0.03)
Xiong 2023	Longitudinal Changes and Predictive Value of Choroidal Thickness for Myopia Control after Repeated Low-Level Red-Light Therapy	Ruilin Xiong	China	2023	Supported by the State Key Laboratory of Ophthalmology and National Natural Science Foundation of China. Authors Mingguang He and Zhuoting Zhu hold patents related to RLRL and have equity in Eyerising Ltd.	To evaluate longitudinal changes in macular choroidal thickness (mCT) in myopic children treated for 1 year with repeated low-level red-light (RLRL) therapy and their predictive value for treatment efficacy on myopia control	Randomised controlled trial	Original RCT July 2019	162	120	Myopia (SER-1.00 D to-5.00 D)	Myopia	Home	8-13 years	Repeated Low-Level Red-Light (RLRL) therapy + Single Vision Spectacles (SVS)	Desktop home-use unit (Eyerising, 650 nm)	650nm			Continuous	3 minutes per session	2	5 days per week											Single Vision Spectacles (SVS)								Macular choroidal thickness (mCT)		Cumulative Adjusted Mean (95% CI)	Swept-Source Optical Coherence Tomography (SS-OCT; Topcon Triton)	12 months	Average: -10.407 mm (- 15.212 to -5.602) Central: -12.090 mm (-18.086 to -6.094	Average: +9.089 mm (4.705 - 13.474) Central: 7.342 mm (1.857 - 12.827
Xiong 2022	Sustained and rebound effect of repeated low-level red-light therapy on myopia control: a 2-year post-trial follow-up study	Ruilin Xiong	China	2019-2020	Supported by the Fundamental Research Funds of the State Key Laboratory of Ophthalmology and the National Natural Science Foundation of China. Conflicts disclosed: authors Mingguang He and Zhuoting Zhu are inventors on patents for the RLRL technology.	To evaluate the long-term efficacy and safety of continued repeated low-level red-light (RLRL) therapy on myopia control over 2 years, and the potential rebound effect after treatment cessation	Other: Post-trial follow-up observational study based on an earlier randomized controlled trial	July 2019 (RCT); follow-up July 2021	138 attended visit	114 included in long term analysis	Myopia (SER-1.00 D to-5.00 D)	Myopia	Other: RLRL at home	8-13 years	repeated low-level red-light	Eyerising (Suzhou Xuanjia Optoelectronics Technology)	650 ± 10 nm		0.29 mW through 4 mm pupil	Continuous	3 minutes per session	Twice daily, minimum 4 hours apart, 5 days per week		2) RLRL-SVS OR 3) SVS-RLRL	desktop light ther- apy device (Eyerising, Suzhou Xuanjia Optoelectronics Technology, Jiangsu, China	650+/-10 NM		0.29mW over 4mm pupil	Continuous	3 mins	Twice	5 days per week		SVS-SVS								Axial length	Change in AL	Mean(SD)	IOLMaster 500 (Carl Zeiss)	24 months	SVS-SVS: +0.64 ± 0.29 mm	SVS-RLRL: +0.44 ± 0.37 mm RLRL-SVS: +0.50 ± 0.28 mm RLRL-RLRL: +0.16 ± 0.37 mm
Xiong 2021	Orthokeratology and Low-Intensity Laser Therapy for Slowing the Progression of Myopia in Children	Fen Xiong	China	2018-2019	Funded by the Science and Technology Program of Health Commission of Jiangxi Province (202130555). Authors declared no competing interests.	To test whether low-level laser therapy (LLLT) can slow the progression of myopia in children, and to compare its efficacy to orthokeratology (OK) lenses and single-vision distance spectacles.	Randomised controlled trial	2018-09-01	300	229	Myopia	Myopia	Hospital	6-16 years	Low-Level Laser Therapy (LLLT)	Ya Kun Optoelectronic Co., Ltd.	650nm		2 ± 0.5 mW	Continuous	3 minutes per session,	Twice per day		Orthokeratology (OK) lenses	Boston Equalens II					Worn overnight for at least 7 hours				Single-vision distance spectacles								Axial Length	Change in AL	mean ± SD	Carl Zeiss IOLMaster	6 months	+0.23 ± 0.06 mm	-0.06 ± 0.15 mm	+0.06 ± 0.15 mm
Wu 2024	Efficacy of repeated low-level red-light therapy combined with optical lenses for myopia control in children and adolescents	Gangyue Wu	China	2021	Supported by the Jinhua Science and Technology Plan Project (No. 2021-4-099). No conflicts of interest declared.	To evaluate the efficacy and safety of repeated low-level red-light (RLRL) therapy combined with different optical interventions (orthokeratology, DDM lenses, SVS) for controlling myopia in children and adolescents.	Non-randomised experimental study	2021-01-01	120	108	Myopia	Myopia	Other: Home & Hospital	5-15 years	RLRL +OK (orthokeratology)	RLRL: Class 1 laser, Londa optics - Eyerising protocol OK: Eyebright Medical Techno- logy (Beijing) Co., Ltd.	635 nm		0.35mW	Continuous		twice daily with 4+ hour interval		RLRL+SVS OR DDM lenses	RLRL: Class 1 laser, Londa optics DDM lenses provided by Shanghai Weixing Optics, featuring a central optical zone of 10 mm and 420 aspherical microlenses with diop ter of +3.25-+4.75 D, arranged in hexagonal patterns around the periphery.	635 nm		0.35 mw, twice	Continuous		twice daily with 4+ hour interval			SVS		635nm		Continuous		Twice		Axial Length	Change in AL	Mean (SD)	Lenstar 2000	24 months	Control (SVS): 0.86 ± 0.31 mm	RLRL+OK: 0.09 ± 0.24 mm	RLRL+DDM: 0.14 ± 0.24 mm
Wang 2023	Axial Shortening in Myopic Children after Repeated Low-Level Red-Light Therapy: post Hoc Analysis of a Randomized Trial	Wei Wang	China and Austrailia	2023	This research was supported in part by a grant from the Fundamental Research Funds of the State key Laboratory of 0phthal- mology The Rapid Service Fee was funded by the grant from the Fundamental Research Funds of the State key Laboratory of 0phthalmology Mingguang He and Zhuoting Zhu are inventors for the technology men- tioned in the study patented as ‚Äò‚ÄòA method to increase retinal blood f…	To investigate the frequency and degree of axial length (AL) shortening in myopic children treated with repeated low-level red-light (RLRL) therapy over a 12-month period.	Other: Post hoc analysis of a multicenter, single-masked, randomized controlled trial	2012-09-01	264	264	Myopia (SER-1.00 D to-5.00 D)	Myopia	Hospital	8 - 13 years	RLRL	Eyerising (Suzhou Xuanjia Optoelectronics)	650 ± 10 nm		0.29 mW through 4 mm pupil		3 minutes per session	Twice daily, at least 4 hours apart, 5 days/week												SVS								Frequency of axial length shortening >0.05mm, >0.10mm, >0.20mm		%	IOL-Master 500 (Carl Zeiss)	12 months	AL shortening >0.05 mm: 1.38% (SVS) AL shortening >0.10 mm: 0% (SVS) AL shortening >0.20 mm: 0% (SVS)	AL shortening >0.05 mm: 21.85% (RLRL) AL shortening >0.10 mm: 15.13% (RLRL) AL shortening >0.20 mm: 5.88% (RLRL)
Torii 2022	Short-Term Exposure to Violet Light Emitted from Eyeglass Frames in Myopic Children: A Randomized Pilot Clinical Trial	Hidemasa Torii	Japan	April 2019-Jan 2020	Funded by Tsubota Laboratory, Inc. Authors hold related patents (WO2015/186723 and WO2017/094886). Some authors are employees or directors of related companies.	To assess the short-term safety and potential myopia-suppressing effect of violet light emitted from specially designed eyeglass frames in children.	Randomised controlled trial	2019-04-01	43	41	Myopia	Myopia	Hospital	6 to 12 years	Violet Light Frames (VLf)	VLf developed by Tsubota Laboratory, Inc.	360-400 nm	310 µW/cm≤		Continuous	3 hours daily	once	Use monitored via integrated light sensor and iPod-based tracking system											Pseudo-placebo frames with <10 µW/cm≤ violet light emission			10 ŒºW/cm2 +100%, -50%					Visual acuity Intraocular pressure Tear film break-up time Corneal endothelial cell density Slit-lamp/fundus findings OCT assessment Dermopathy and adverse events		Mean	FT-01 tonometer, EM-3000 specular microscope, DRI OCT Triton	4, 12 and 24-week visits		No significant difference in any safety metrics between groups
Tang 2023	Axial length shortening in myopic children with Stickler syndrome after repeated low-level red-light therapy	Xiang- Hua Tang	China	2023	He MG is inventor for the RLRL technology mentioned in the study patented as ‚ÄúA method to increase retinal blood flow and metabolism‚Äù and director in Eyerising Ltd. and Eyerising International Pty Ltd.;	To report the myopia-controlling effect of repeated low-level red-light (RLRL) therapy in patients with Stickler syndrome (STL), an inherited collagenic disease typically presenting with early onset myopia.	Case series		3 children/ 6 eyes	3	Myopia in Sticklers Syndrome	Myopia	Hospital	3 to 11 years	RLRL	Eyerising, Suzhou Xuanjia Optoelectronics Technology, Jiangsu Province, China	650+/-10nm		0.29 mW through a 4 mm pupil		3 minutes	Twice a day	Compliance automatically logged																			Axial Length	Change in AL	Individual data- no means	Optical biometry IOLMasterÆ700, Carl Zeiss Meditec AG, Jena, Germany)	Different time lengths in each case- post start of RL tx Case 1- 17m Case 2- 3m Case 3- 6m		Case 1 (3 years, 17 months follow-up): OD:-0.43 mm OS:-0.63 mm Case 2 (7 years, 3 months follow-up): OD:-0.07 mm OS:-0.03 mm Case 3 (11 years, 6 months follow-up): OD:-0.14 mm OS:-0.41 mm
Shang 2024	Comparison of Changes in Retinal Vascular Density and Thickness After Using Low-Level Red Light and 0.01% Atropine in Premyopic Children	Lili Shang	China	2021	Supported by Key R&D and Promotion Project of Henan Science and Technology Department Key Scientific Research Project of Universities of Henan Education Department. New technology and new project of the First Affiliated Hospital of Zhengzhou University	To compare changes in superficial retinal vascular density (SRVD), deep retinal vascular density (DRVD), and retinal thickness (RT) after low-level red light (RLRL) or 0.01% atropine treatment in premyopic schoolchildren.	Randomised controlled trial	2021-07-01	69	62	Myopia and Premyopia (SER > -0.75 D and ‚â§ 0.50 D)	Myopia	Hospital	6-12 years	Low-Level Red Light	Leshi Yangguang (Chenzhou Eye Care Health Technology Co., Ltd.)	650 ± 10 nm		~0.85 mW	Continuous	3 minutes per session	2x/day (‚â•4 hours apart)	Compliance monitored via online diary platform	0.01% atropine							Once nightly	Poor compliance defined as >10% leftover in bottle										Axial length	Change in AL	Mean ± SD	(IOLMaster-500; Carl Zeiss Meditec AG, Jena, Germany	6 months		+0.08 ± 0.08 mm	+0.16 ± 0.14 mm
Qiu 2024	A retrospective study of cumulative absolute reduction in axial length after photobiomodulation therapy	Kaikai Qui	China	2020-2023	Supported by multiple Chinese municipal science and research grants. Authors declared no competing interests.	To assess the age and timeline distribution of axial length shortening among myopic children treated with photobiomodulation (PBM) therapy in real-world settings using the CARE outcome measure.	Cohort study	2020	342		Myopia	Myopia	Hospital	4 - 13 years	PBM therapy device- consumer controlled light therapy device.	Airdoc Seconee, Beijing Airdoc Technology Co., Ltd., Beijing, China.	650±10 nm	0.37 mW or 1.20 mW depending on group		Continuous	3 minutes per session	2x/day, ‚â•4 hours apart	Used at home under parental supervision; same biometric device used at baseline and follow-up																			Axial length	Change in AL	Myopia control effectiveness in terms of AL shortening was defined as an AL reduction of ‚â•0.00 mm/year (CARE 1), ‚â• 0.05 mm/year (CARE 2), ‚â• 0.10 mm/year (CARE 3) and ‚â•0.20 mm/year (CARE 4)	Optical biometry IOL-Master (Carl Zeiss 500/700, Meditec, Oberkochen, Germany	12 months		66 Care 1 41(62.10%) Care 2 32(48.50%) Care 3 21(31.80%) Care 4 8(12.10% Magnitude of AL shortening being -0.137 (0.056) mm/year among children aged 9-13 years and +0.271 (0.261) mm/year among children aged 4-8 years (P<0.001)
Nct 2021	The Effectiveness and Safety of Low-intensity Single-wavelength Red Light in Controlling High Myopia in Children and AdolescentsÔºöA Randomized, Controlled, Multicenter Clinical Trial	Yan Xu	China	2021-2022	Clinical Research Program of Shanghai Municipal Commission of Health and Family Planning of China Eyerising Ltd.; and Zuoguan Medical Equipment Ltd. (a subsidiary of Eyerising Ltd.).	To assess the effectiveness and safety of RLRL for myopia control in children and adolescents with high myopia.	Randomised controlled trial	2021-02-01	192	188	High myopia (defined as SER ‚â§-4.0 D)	Myopia	Other: Home and Hospital	6-16 years	Repeated Low-Level Red Light Therapy (RLRL)	Eyerising International device	650+/-10nm		0.29mW through 4 mm pupil	Continuous	3 minutes	2x/day, 7 days/week, ‚â•4 hrs apart	Illuminance 1600 lux 7 days per week Treatment logged and monitored remotely											Single-vision spectacles (SVS)								Axial Length (AL)	Change in AL	Mean ¨± SD	Optical biometry IOLMaster 700 (Carl Zeiss Meditec	12 months	0.34 mm (95% CI, 0.30-0.39 mm	-0.06 mm 95% CI, -0.10 to -0.02 mm
Liu 2024	The Effects of Repeated Low-Level Red-Light Therapy on the Structure and Vasculature of the Choroid and Retina in Children with Premyopia	Zhuzhu Liu	China	2021-2022	National Natural Science Foundation of China (Grant No. 82070929); Authors declare no conflicts of interest	The purpose of this study was to explore the effects of repeated low-level red-light (RLRL) therapy on the structure and vasculature of the choroid and retina in Chinese children with premyopia.	Randomised controlled trial	2021-08-01	94	85	Premyopia	Myopia	Home	7-12 years	RLRL	Eyerising, Suzhou Xuanjia Optoelectronics Technology, Kunshan city, China	650 ± 10 nm	Not directly reported (only illuminance ‚âà1600 lx)	0.29 mW (for 4-mm pupil)	Continuous	3 minutes per session	2x/day, >4 hours apart	Used at home, compliance tracked automatically Illuminance 1600lux											No RLRL therapy								Choroidal Thickness		Mean ± SD	SS-OCT/OCT-A (VG200S; SVision)	Multiple (1, 3, 6, 9, 12 mo)		11.99 ± 32.66	28.74 ± 26.89
Liu 2024	Effects of repeated low-level red-light therapy on macular retinal thickness and microvascular system in children with myopia	Linlin Liu	China	2024	The authors received no financial support for the authorship and/or publication of this article	To use OCTA to analyze the effects of repeated low-level red-light (LLLT) therapy on macular retinal thickness and the microvascular system in children with myopia to evaluate safety‚Äã	Randomised controlled trial	2022-02-01	40 children (80 eyes)	Prospective observational study	Myopia	Myopia	Hospital	6-14 years	Repeated Low-Level Red-Light Therapy		650+/-10nm		2.0+/-0.50mW	Continuous	3 minutes	2 with 4 hour interval	Continued for 6 months, adherence monitored																			Axial Length (AL)	Change in AL	Mean ± SD	Optical Biometry:	All outcomes: 1, 3, and 6 months		Baseline 24.86 ± 0.97 1 month 24.76 ± 0.95 3 months 24.73 ± 0.96 6 months 24.72 ± 0.93
Liu 2024	Effectiveness of repeated low-level red light in myopia prevention and myopia control	Guihua Lui	China	2022-2023	National Natural Science Foundation of China Tianjin Key Medical Discipline (Specialty) Construction Project	To compare the effects of RLRL treatment on axial length growth and refractive error changes in myopic and premyopic children	Randomised controlled trial	2022-03-01	170	144	Myopia & Premyopia	Myopia	Hospital	8-13 years	Repeated Low-Level Red Light Therapy	Eyerising; Suzhou Xuanjia Optoelectronics Technology, Suzhou, China	650 ± 10 nm			Continuous	3 mins	2x daily (interval >4 hours), 7 days/week	Home-based use; compliance automatically tracked online											Spectacle wear (standard care)								Axial Length (AL)	Change in AL	Mean ± SD	Biometry Lenstar LS-900; Haag-Streit AG, Berne, Switzerland	12 months	0.415 ± 0.171 mm (M-C) 0.292±0.128 mm (PM-C)	0.033 ± 0.123 mm (M-RL) 0.145±0.175 mm (PM-RL)
Liu 2024	Axial Shortening Effects of Repeated Low-level Red-light Therapy in Children with High Myopia: A Multicenter Randomized Controlled Trial	Guihua Lin	China	2022	National Natural Science Foundation of China (No. 82070429), Tianjin Key Medical Discipline (Specialty) Construction Project	To evaluate the effectiveness and safety of repeated low-level red-light (RLRL) in delaying the progression of high myopes with-6.00 diopters (D) or worse.	Randomised controlled trial	2022-03-01	202	169	Myopia	Myopia	Home	7-12 years	Repeated Low-Level Red-Light Therapy (RLRL) + Single Vision Spectacles	Eyerising; Suzhou Xuan- jia Optoelectronics Technology)	650 +/-10nm			Continuous	3 minutes	2	5 days per week																			Axial Length Change	Change in AL	Mean ± SD	Optical Biometry Lenstar LS-900; Haag-Streit AG	12 months	0.32 ± 0.09 mm P < .001.	-0.11 ± 0.25 mm,
Lin 2023	A Study on the Effectiveness of 650-nm Red-Light Feeding Instruments in the Control of Myopia	Zhi-Hong Lin	China	2019	International Science and Technology Cooperation Research Project of Shenzhen Science and Technology Innovation Committee, Sanming Project of Medicine in Shenzhen, Shenzhen Fund for Guangdong Provincial High-level Clinical Key Specialties	To analyze the effectiveness of 650- nm red-light feeding instruments in the control of myopia.	Non-randomised experimental study	2019-04-01	173	164	Myopia	Myopia	Other: Community & Home	6-18 years	Red-light feeding instrument for mild-to-moderate myopia(RLMM group)	Eyerising single-wavelength 650-nm red-light therapeutic instrument	650 nm		2 ± 0.5 mW	Continuous	3 min/session,	twice daily, 5 days per week	Participants were supervised by parents; treatment required a 4-hour gap between sessions.											Single-vision spectacle treatment (SVSMM group)							Standard glasses prescription for myopia control	Axial Length Change	Change in AL	Mean and standard deviation	Optical Biometry IOLMaster 700 Zeiss	12 months	SVSMM 0.08 ± 0.40 mm	RLS (severe myopia) (-0.07 ± 0.11 mm) RLMM (mild mod myopia) (-0.03 ± 0.11mm) groups (p < 0.001)
Jiang 2022	Effect of Repeated Low-Level Red-Light Therapy for Myopia Control in Children: a Multicenter Randomized Controlled Trial	Yu Jiang	China	2019-2020	Fundamental Research Funds of the State Key Laboratory of Ophthalmology, National Natural Science Foundation of China The author(s) have made the following disclosure(s): Z.Z.: Patent ‚ÄúA method to increase retinal blood flow and metabolism‚Äù M.H.: Patent ‚ÄúA method to increase retinal blood flow and metabolism"	To assess the efficacy and safety of repeated low-level red-light (RLRL) therapy in myopia control in children.	Randomised controlled trial	2019-07-01	264 children	225	Myopia	Myopia	Hospital	8-13 years	Repeated low-level red-light (RLRL) therapy + single-vision spectacles (SVS)	Eyerising [Suzhou Xuanjia Optoelectronics Technology	650+/-10nm		0.29mW through 4mm pupil	Continuous	3 minutes	Twice daily, 5 days per week, with a minimum interval of 4 hours between sessions	Treatment administered at home under parental supervision											Single-vision spectacles (SVS) only								Axial Length	Change in AL	Mean ± SD	Optical biometry IOLMaster (Carl Zeiss 500, Meditec)	12 months	0.38 mm (95% CI, 0.34- 0.42 mm)	0.13 mm (95% CI: 0.09 to 0.17 mm)
He 2023	Effect of Repeated Low-level Red Light on Myopia Prevention Among Children in China With Premyopia: a Randomized Clinical Trial	Xiangui He	China		This work was supported by grants from National Key R&D Program of China; grants from National Natural Science Foundation of China; grant from Shanghai 2022 ‚ÄúScience and Technology Innovation Action Plan‚Äù Outstanding Academic/Technical Leaders Program; grant from Shanghai 2022 Medical Outstanding from Medical Innovation Research Project of Shanghai Science and Technology Commission 2021; and …	To assess the efficacy and safety of a repeated low-level red-light (RLRL) intervention in preventing incident myopia among children with premyopia	Randomised controlled trial	April 1, 2021	278	231	Premyopia	Myopia	Other: Home & school	6 to 11 years	Repeated low-level red-light (RLRL) therapy	Eyerising, Suzhou Xuanjia Optoelectronics Technology	650 nm			Continuous	3 minutes per session		The intervention was conducted 5 days per week, at school during semesters and at home during winter and summer vacations											Usual activities without RLRL therapy								rate of myopia (defined as SER ‚â§ -0.50 D)		%	Autorefractor (KR8800, Topcon)	12 months	61.3% (68 of 111)	40.8% (49 of 120)
Dong 2023	Myopia Control Effect of Repeated Low-Level Red-Light Therapy in Chinese Children: A Randomized, Double-Blind, Controlled Clinical Trial	J Dong	China	2019-2021	Funder: Fundamental Research Funds of the State Key Laboratory of Ophthalmology, Eyerising Ltd Competing Interests: Z.Z. holds a patent (CN201910490186.6: ‚ÄúA Method to Increase Retinal Blood Flow and Metabolism‚Äù) related to the study. M.H. is a board member and equity owner of Eyerising Ltd., which is related to the study.	To assess the efficacy and safety of repeated low-level red-light (RLRL) therapy in controlling myopia progression in children.	Randomised controlled trial	2019-11-01	112	108(96.4%)	Myopia	Myopia	Hospital	7-12 years	Repeated low-level red-light (RLRL) therapy	Desktop red-light therapy device (Eyerising; Suzhou Xuanjia Optoelectronics Technology)	650nm		0.29 mW over 4mm pupil	Continuous	3 minutes	Twice daily (minimum 4-hour interval)	Parents supervised device use at home. Compliance was monitored via treatment logs.											Sham device with 10% of the original power	Desktop red-light therapy device (Eyerising; Suzhou Xuanjia Optoelectronics Technology)			Continuous	3 minutes	Twice daily (minimum 4-hour interval)		Change in cycloplegic spherical equivalent refraction (SER)		Mean ± SD	KR-8900 autorefractor (Topcon)	6 months	-0.11 ± 0.33 D	+0.06 ± 0.30 D (P = 0.003)
Deen 2024	Three-Month Interim Analyses of Repeated Low-Level Red-Light Therapy in Myopia Control in Schoolchildren: A Multi-Ethnic Randomized Controlled Trial	Nellie Deen	Melbourne, Australia.	2022-2024	Eyerising International	To assess the efficacy and safety of repeated low-level red-light (RLRL) therapy in controlling myopia progression among multi-ethnic school-aged children.	Randomised controlled trial	Between August 2022 and November 2023	34	31	Myopia	Myopia	Community	8-13 years	Repeated low-level red-light (RLRL) therapy	Semi-conductor laser product (Eyerising International Pty Ltd, Melbourne, Australia)	650 ± 10 nm		2.00 ± 0.50 mW	Continuous	3-minute sessions	Twice daily (minimum 4-hour interval), 5 days per week	Device was internet-connected with automated logging. ‚Ä¢ Parents supervised each session, and compliance was monitored with reminders for adherence.											Single-vision spectacles (SVS)								Change in axial length (AL)	Change in AL	Mean ± SD		3 months	+0.03 ± 0.05 mm	-0.07 ± 0.07 mm
ChiCtr 2023	The safety of repeated low-intensity red light therapy for the treatment of myopia in children	Mengxia Zhu	China	2023	Supported by the Provincial Natural Science Foundation of Hubei	To investigate the safety of repetitive low-level red-light therapy (RLRLT) in children with myopia.	Non-randomised experimental study	2022-02-01	115	108	Myopia	Myopia	Hospital	6-14 years	Repetitive low-level red-light therapy	Eyerising, Suzhou Xuanjia Optoelectronics Technology Co., Ltd., Jiangsu, Chin	650 ± 10 nm	2mW	Continuous	3min	2	4h between sessions 5 days a week												SVS								Axial Length	Change in AL	Mean	IOLMaster (AL-Scan, NIDEK Co.)	6, 12 months	6 months 0.245 mm 12-month 0.452 mm	6 months -0.075 mm 12-month -0.049 mm
Chen 2022	Efficacy Comparison of Repeated Low-Level Red Light and Low-Dose Atropine for Myopia Control: A Randomized Controlled Trial	Yanxian Chen	China	2022	none	compare the treatment efficacy between repeated low-level red light therapy and 0.01% atropine eye drops for myopia control	Randomised controlled trial		62	60	Myopia	Myopia	Hospital	7-15 years	Repeated low-level red light	Eyerising; Suzhou Xuanjia Optoelectronics Technol- ogy, Jiangsu, China	650+/-10nm			Continuous	3 minutes	2	4 hours between sessions, for 7 days a week	0.01% Atropine	0.01% atropine eye drops (Shenyang Xingqi Pharmaceutical Co., Ltd., Liaon- ing, China						both eyes at night											Axial Length	Change in AL	Mean	IOLMaster 500 (Carl Zeiss Microscopy, Jena, Germany) before cycloplegia	12 month		0.08 mm (95% confidence interval [CI], 0.03-0.14)	0.33 mm (95% CI, 0.27-0.38
Chen 2023	Low-intensity red-light therapy in slowing myopic progression and the rebound effect after its cessation in Chinese children: a randomized controlled trial	Hongyan Chen	China	2021	None	To investigate the effect of low-intensity red-light (LRL) therapy on myopic control and the response after its cessation.	Randomised controlled trial	2020-11-01	102	82	myopia of-0.75 to-6.00 dioptre (D) SER	Myopia	Hospital	6-13 years	Low-intensity red-laser + Single focus Spectacles	LONGDA, Jilin Longda Optoelectronics Technology, Jilin, China	635nm	0.35 ± 0.02 mW/cm2,	0.35±0.02 mW.	Continuous	3 minutes	2												Single Focus Spectacles								Axial Length	Change in AL	mean median	AL-scan device (Nidek Inc., Japan) before cycloplegi	12 months	0.39 mm (95%CI: 0.33 to 0.45 mm) measured in the SFS group (p<0.05).	0.01 mm (95%CI,-0.05 to 0.07 mm)
Cao 2024	Daily Low-Level Red Light for Spherical Equivalent Error and Axial Length in Children With Myopia: A Randomized Clinical Trial	Kai Cao	China	2024	Beijing Institute of Ophthalmology, Beijing Tongren Hospital, Capital Medical University,Beijing, China (Cao, Tian, Jin, Jie);Beijing Tongren Eye Center, Beijing Tongren Hospital, Capital Medical University, Beijing, China (Ma, Zhao, Li, Jie) Beijing Tongren Hospital has patent for LLRL device.	To evaluate the efficacy and safety of daily 650-nm low-level red light (LLRL) for myopia treatment	Randomised controlled trial	2021-08-01	336	260	Myopia - cycloplegic spherical equivalent error (SER) of between-6 diopters (D) and 3 D in both eyes. For children withoutmyopia, the change in SER was -0.75 D or less in the last year	Myopia	Hospital	6-12 years	low-level red light	Myopia and Amblyopia Treatment Apparatus.	650nm		0.29mW over 4mm pupil	Continuous	3 minutes	2												SVS								Axial Length	Change in AL	Mean	Biometry Lenstar LS 900; HAAG-STREIT AG	12 months	0.26 (0.16) mm	-0.11 (0.10)mm
Study ID	Title	First Author	Country in which study was conducted	Year of study	Funder/COI	Aim of study	Study design	Start date	Total number of participants enrolled	Total Completing Study	Target eye condition	Target eye condition - Category	Study environment	Age range of participants	Name of intervention Intervention 1	Device used Intervention 1	Wavelength Intervention 1	Irradiance (W/cm2) Intervention 1	Power (mW) Intervention 1	Type of light (continuous, pulsed) Intervention 1	Exposure duration Intervention 1	Administrations per day Intervention 1	Other comments Intervention 1	Name of intervention Intervention 2	Device used Intervention 2	Wavelength Intervention 2	Irradiance (W/cm2) Intervention 2	Power (mW) Intervention 2	Type of light (continuous, pulsed) Intervention 2	Exposure duration Intervention 2	Administrations per day Intervention 2	Other comments Intervention 2	Intervention(s) and controls:	Name of intervention Control (if any)	Device used Control (if any)	Wavelength Control (if any)	Irradiance (W/cm2) Control (if any)	Type of light (continuous, pulsed) Control (if any)	Exposure duration Control (if any)	Administrations per day Control (if any)	Other comments Control (if any)	Name of outcome (for example axial length, quality of life) Primary Outcome	Method of aggregation, f.ex. mean, median Primary Outcome	Outcome measurement technology/tool (f.ex. optical biometry, questionnaire) Primary Outcome	Principal/primary timepoint, f.ex. 12 months Primary Outcome	Reported result of controls f.ex. value of mean/median, SD, CI Primary Outcome	Reported result of intervention 1, f.ex. value of mean/median, SD, CI Primary Outcome	Reported result of intervention 2 f.ex. value of mean/median, SD, CI Primary Outcome	Reported result of intervention 3 f.ex. value of mean/median, SD, CI Primary Outcome
AMBLYOPIA STUDIES
Vanzini 2016	Amblyopia: Can Laser Acupuncture be an Option?	Marzio Vanzini	Italy	2015	No funding declared. Michele Gallamini is a co-inventor of the Biolite device but holds no commercial interest.	To report the outcomes of laser acupuncture using ultralow-level light intensity in children with amblyopia, as an alternative to classical acupuncture, especially for improving compliance in young patients.	Case series		13		Amblyopia (All patients were amblyopic or had BCVA < 20/20 (Snellen fraction)	Amblyopia	Hospital	3-11 years	Ultralow-Level Laser Light (ULLLL) acupuncture	Biolite (RGM SpA, Genoa, Italy)	635 nm (modulated red light)	0.115 mW/cm¬≤	0.02 mW over a 0.13-cm^2 spot	Pulsed	20 half-second flashes per acupoint (manual rate ~1 Hz)	One session per week	Spot size 0.13 cm¬≤, no physical contact with skin; acupoints stimulated bilaterally; sessions repeated weekly until no further BCVA improvement Acupuncture Points Used BL-2 (Zanzhu) ‚Äì at the medial end of the eyebrow EX-HN5 (Taiyang) ‚Äì in the temple region, approximately 1 cun posterior to the midpoint between the lateral end of the eyebrow and the outer canthus ST-2 (Sibai) ‚Äì below the ey…																			Best Corrected Visual Acuity (BCVA) improvement	Change from baseline	Snellen fraction, under cycloplegia when needed, measured consistently by same operator and same device			Patient AL First Treatment (May/13) RE: 20/25 LE: 20/20 Control Visit (Oct/14) RE: 20/20 LE: 20/20 Patient BA First Treatment (Jan/12) RE: 20/22 LE: 20/22 Control Visit (Sep/14) RE: 20/20 LE: 20/20 Patient BY First Treatment (Feb/14) RE: 20/20 LE: 20/25 Control Visit (Mar/15) RE: 20/20 LE: 20/20 Patient BM First Treatment (Mar/11) RE: 20/22 LE: 20/13 Control Visit (Nov/14) RE: 20/20 LE: 20/20 Pat…
Lin 2021	Effect of low-level laser irradiation on accommodation and visual fatigue	Ching-Huang Lin	Taiwan	2021	National Yunlin University of Science & Technology, Yunlin	This study used low-level laser irradiation on auricular points for the eyes of junior college teenagers with myopia to observe the changes in refractive errors and eye accommodation.	Cohort study	1905-07-13	49	49	Amblyopia	Amblyopia	Community	15-17	Low-level laser irradiation (LLLI) on auricular acupuncture points	laser equipment	830 nm		30 mW	Continuous	30 minutes	Single session after class	Frequency 7Hz Laser beam 0.1cm^2																			Change in refractive error	Mean	Autorefraction SHIN-NIPPON K5001	30-minute post-intervention	Before class RE:-2.78¬±1.77 LE: -2.25¬±2.04 After class RE:-2.85¬±1.73 LE: -2.57¬±1.72 After rest: RE: -2.83¬±1.80 LE: -2.49¬±1.75 p>0.05 RE, LE	Before class RE: ‚àí2.82¬±1.80 LE: ‚àí2.44¬±1.75 After class RE: -2.94¬±1.77 LE: -2.52¬±1.83 After tx RE: ‚àí2.76¬±1.78 LE: -2.40¬±1.75 p<0.05 RE+LE
Ivandic 2012	Low-level laser therapy improves visual acuity in adolescent and adult patients with amblyopia	Boris T. Ivandic, M.D.	Germany	2012	none	To examine the effects of low-level laser therapy (LLLT) on visual acuity in adolescent and adult patients with amblyopia.	Non-randomised experimental study		178 (13 adolescents)		Amblyopia caused by ametropia or strabismus	Amblyopia	Other: University	13-72	Low-Level Laser Therapy (LLLT)	Continuous wave-type semiconductor laser diode. Laser components GmbH, Groebenzell, Germany	780 nm		7.5 mW	Pulsed (292 Hz, 1:1 duty cycle)	30 seconds per treatment		3 mm¬≤, and the mean total dose was 0.77 J/cm¬≤.											Mock treatment	Continuous wave-type semiconductor laser diode. Laser components GmbH, Groebenzell, Germany						Laser beam directed above the nose without contacting the eye in 20 pts	Improvement in best corrected distant visual acuity	Percentage of eyes achieving improvement	Snellen projection	6 months	No changes were noted in the control group.	Ametropic amblyopia: Visual acuity improved in 91% of treated eyes (p < 0.001), with 56.2% gaining three or more lines. Strabismic amblyopia: Visual acuity improved in 89% of treated eyes (p < 0.001), with 53.6% gaining three or more lines.
Study ID	Title	First Author	Country in which study was conducted	Year of study	Funder/COI	Aim of study	Study design	Start date	Total number of participants enrolled	Total Completing Study	Target eye condition	Target eye condition - Category	Study environment	Age range of participants	Name of intervention Intervention 1	Device used Intervention 1	Wavelength Intervention 1	Irradiance (W/cm2) Intervention 1	Power (mW) Intervention 1	Type of light (continuous, pulsed) Intervention 1	Exposure duration Intervention 1	Administrations per day Intervention 1	Other comments Intervention 1	Name of intervention Intervention 2	Device used Intervention 2	Wavelength Intervention 2	Irradiance (W/cm2) Intervention 2	Power (mW) Intervention 2	Type of light (continuous, pulsed) Intervention 2	Exposure duration Intervention 2	Administrations per day Intervention 2	Other comments Intervention 2	Intervention(s) and controls:	Name of intervention Control (if any)	Device used Control (if any)	Wavelength Control (if any)	Irradiance (W/cm2) Control (if any)	Type of light (continuous, pulsed) Control (if any)	Exposure duration Control (if any)	Administrations per day Control (if any)	Other comments Control (if any)	Name of outcome (for example axial length, quality of life) Primary Outcome	Method of aggregation, f.ex. mean, median Primary Outcome	Outcome measurement technology/tool (f.ex. optical biometry, questionnaire) Primary Outcome	Principal/primary timepoint, f.ex. 12 months Primary Outcome	Reported result of controls f.ex. value of mean/median, SD, CI Primary Outcome	Reported result of intervention 1, f.ex. value of mean/median, SD, CI Primary Outcome	Reported result of intervention 2 f.ex. value of mean/median, SD, CI Primary Outcome	Reported result of intervention 3 f.ex. value of mean/median, SD, CI Primary Outcome
LID MARGIN STUDIES
Zhai 2022	Safety and Feasibility of Low Fluence Intense Pulsed Light for Treating Pediatric Patients with Moderate-to-Severe Blepharitis	Zimeng Zhai	China	2019-2021	Funded by National Natural Science Foundation of China and various Shanghai research programs. Authors declared no conflict of interest.	To evaluate the safety and feasibility of low fluence intense pulsed light (IPL) therapy in treating children with moderate-to-severe blepharitis and explore factors associated with meibomian gland (MG) recovery.	Non-randomised experimental study	43497	17 (33 eyes)	17 (33 eyes)	Moderate-to-severe pediatric blepharitis	Lid disease	Hospital	5 to 16 years	Low Fluence Intense Pulsed Light (IPL) therapy	SOLARI IPL system (Lutronic Corporation, Korea)	570 nm filter			Pulsed	~9 overlapping pulses/session	4 IPL sessions 3-4 week interval	4 sessions (over approx. 3 months) Topical moxifloxacin and eye atomization . Ultrasonic nebulizer (Jiangsu Yuyue Medical(ina) was filled with 0.3% hyaluronic acid sodium eye drops and 0.9% normal saline for 20 min of binocular atomization. IPL (SOLARI, Instruments Co., Ltd., Yancheng, China) Lutronic Corporation, Goyang, Korea) was used at filter of 570 n)																			Corneal fluorescein staining (CFS)	Mean change (SD)	Slit-lamp examination with fluorescein dye	3-4 weeks post final session		Pre-treatment: 1.42 ¬± 2.45 Post-treatment: 0.45 ¬± 1.03 P=0.003
Totuk 2021	Efficacy of intense pulsed light treatment for moderate to severe acute blepharitis or blepharoconjunctivitis: A retrospective case series	√ñzg√ºn Melike Gedar Totuk	Turkey and Cyprus	2021	none	To evaluate the efficacy of periocular intense pulsed light (IPL) therapy in the treatment of moderate to severe acute blepharitis or blepharoconjunctivitis.	Case series		11 patients (22 eyes)	11 patients (22 eyes)	Moderate to severe acute blepharitis or blepharoconjunctivitis	Lid disease	Hospital	17-77 years	IPL	E>Eye (ESwin, Paris, France)	580‚Äì1200 nm	9.8‚Äì13 J/cm¬≤		Pulsed light	4 flashes of light immediately below lower eyelid.	Baseline, 2 weeks and 6 weeks	Patients also received warm compresses, eyelid massage, lid hygiene, azithromycin 1% drops, and dexamethasone 0.05% drops																			Ocular Surface Disease Index (OSDI)	Mean (SD)	Standardized self-administered 12-item questionnaire	10 weeks		Baseline: 29.73 ¬± 4.58 10 weeks: 12.36 ¬± 1.40 p < 0.0001
Stonecipher 2019	Low level light therapy for the treatment of recalcitrant chalazia: A sample case summary	Karl Stonecipher	USA	2019	Funded by Physicians Protocol Dr. Stonecipher: Consultant to multiple industry partners (e.g., Espansione, Alcon, Allergan) Dr. Potvin: Received personal fees from Physicians Protocol Authors report no other conflicts of interest	To evaluate the effect of low-level light therapy (LLLT) on the resolution of chalazia unresponsive to previous pharmaceutical or surgical treatments	Other: Retrospective case series (chart review)		26 eyes (22 patients)	22 patients (26 eyes)	Recalcitrant chalazia	Lid disease	Hospital	4-93 years	LLLT	Eye-light¬Æ Treatment mask	633 +/- 10 nm	100 mW/cm¬≤		Continuous	15 minute	One per treatment session (second treatment optionally repeated 24 hrs to 2 months later)	Combined with antibiotic/steroid drops for 2 weeks; adults also received doxycycline 100 mg BID orally; no systemic therapy in pediatric patients																			Resolution of chalazion	Proportions and qualitative chart review	Clinical observation	Up to 2 months post-treatment		Resolution after 1 treatment: 46% (12/26 eyes) Resolution after 2 treatments: 92% (24/26 eyes) Time to resolution ranged from 3 days to 1 month
Qiao 2021	Adverse Events of Intense Pulsed Light Combined With Meibomian Gland Expression Versus Meibomian Gland Expression in the Treatment of Meibomian Gland Dysfunction	Chen Qiao	China	2018-2019	Funded by Youth Projects of Health and Family Planning Commission of Wuhan Municipality (WX18Q46) Projects of Aier Eye Group (AR1904D2) Authors declared no conflicts of interest	To analyze the occurrence and causes of adverse events in IPL-MGX versus MGX treatment for meibomian gland dysfunction (MGD)	Other: Retrospective study	2018-2019	3,689 (2,282 IPL-MGX, 1,407 MGX)		Meibomian gland dysfunction Patients younger than 20 years who received IPL‚ÄêMGX treatment mostly suffered from blepharokeratoconjunctivitis (BKC).	Lid disease	Hospital	9-92 (176pts aged 9-20)	Intense Pulsed Light (IPL) + Meibomian Gland Expression (MGX)	SOLARI (Lutronic Corp, Korea); Couplant SUWEN-B	500-1200nm	9‚Äì13 J/cm¬≤		Intense Pulsed Light (non-laser polychromatic)	~10‚Äì15 light pulses per treatment area	1 session per 2‚Äì3 weeks, up to 10 sessions	Couplants and cooling applied; protective shields used for eyes	Meibomian Gland Expression (MGX)							Weekly, up to 35 sessions	team eye masks used for warm compress										Adverse event incidence	Count and percentage	Clinical observation + slit-lamp exam	During and up to 1 month post-treatment		74/2282 patients (3.24%)	27/1407 patients (1.92%)
Jiang 2024	Therapeutic effect of intense pulsed light on different types of chalazion in children	Jiao Jiang	China	2024	Hebei Province medical science research project	To investigate the effectiveness of Intense Pulsed Light (IPL) therapy for chalazion treatment while exploring potential variations in sensitivity among different types of chalazion.	Randomised controlled trial	44348	149	149	Chalazion	Lid disease	Hospital	0-7	tobramycin eye drops combined with IPL treatment,	EYESIS light pulse MOPT treatment instrument for meibomian gland dysfunction (MDC	500-1200nm	8- 12 J/cm2		Pulsed	5 irradiations per eye, once per week		IPL energy ranged from 8 to 12 J/cm¬≤, adjusted based on individual tolerance.											Tobramycin eye drops (3 times daily) + local hot compress (38‚Äì42¬∞C) twice daily for 5‚Äì10 minutes.								Reduction in chalazion size after treatment	Mean diameter pre- and post-treatment	Color Doppler ultrasound	3 weeks	Cured (100% reduction) 5 (6.76%) Effective (‚â•50% reduction) 16 (21.62%) Ineffective (<50% reduction) 53 (71.62%)	17 (22.67%) were cured (the mean diameter measured 4.31¬±1.73 mm prior to treatment and 0¬±0 mm post-treatment), 39 (52.00%) were effective (The mean diameter measured 4.72¬±2.16 mm prior to treatment and 1.84¬±0.83 mm post-treatment), 19 (25.33%) were ineffec- tive (the mean diameter measured 3.92¬±1.68 mm prior to treatment and 4.22¬±1.67 mm post-treatment)
Study ID	Title	First Author	Country in which study was conducted	Year of study	Funder/COI	Aim of study	Study design	Start date	Total number of participants enrolled	Total Completing Study	Target eye condition	Target eye condition - Category	Study environment	Age range of participants	Name of intervention Intervention 1	Device used Intervention 1	Wavelength Intervention 1	Irradiance (W/cm2) Intervention 1	Power (mW) Intervention 1	Type of light (continuous, pulsed) Intervention 1	Exposure duration Intervention 1	Administrations per day Intervention 1	Other comments Intervention 1	Name of intervention Intervention 2	Device used Intervention 2	Wavelength Intervention 2	Irradiance (W/cm2) Intervention 2	Power (mW) Intervention 2	Type of light (continuous, pulsed) Intervention 2	Exposure duration Intervention 2	Administrations per day Intervention 2	Other comments Intervention 2	Intervention(s) and controls:	Name of intervention Control (if any)	Device used Control (if any)	Wavelength Control (if any)	Irradiance (W/cm2) Control (if any)	Type of light (continuous, pulsed) Control (if any)	Exposure duration Control (if any)	Administrations per day Control (if any)	Other comments Control (if any)	Name of outcome (for example axial length, quality of life) Primary Outcome	Method of aggregation, f.ex. mean, median Primary Outcome	Outcome measurement technology/tool (f.ex. optical biometry, questionnaire) Primary Outcome	Principal/primary timepoint, f.ex. 12 months Primary Outcome	Reported result of controls f.ex. value of mean/median, SD, CI Primary Outcome	Reported result of intervention 1, f.ex. value of mean/median, SD, CI Primary Outcome	Reported result of intervention 2 f.ex. value of mean/median, SD, CI Primary Outcome	Reported result of intervention 3 f.ex. value of mean/median, SD, CI Primary Outcome
MISC STUDIES
Zhai 2022	Safety and Feasibility of Low Fluence Intense Pulsed Light for Treating Pediatric Patients with Moderate-to-Severe Blepharitis	Zimeng Zhai	China	2019-2021	Funded by National Natural Science Foundation of China and various Shanghai research programs. Authors declared no conflict of interest.	To evaluate the safety and feasibility of low fluence intense pulsed light (IPL) therapy in treating children with moderate-to-severe blepharitis and explore factors associated with meibomian gland (MG) recovery.	Non-randomised experimental study	43497	17 (33 eyes)	17 (33 eyes)	Moderate-to-severe pediatric blepharitis	Lid disease	Hospital	5 to 16 years	Low Fluence Intense Pulsed Light (IPL) therapy	SOLARI IPL system (Lutronic Corporation, Korea)	570 nm filter			Pulsed	~9 overlapping pulses/session	4 IPL sessions 3-4 week interval	4 sessions (over approx. 3 months) Topical moxifloxacin and eye atomization . Ultrasonic nebulizer (Jiangsu Yuyue Medical(ina) was filled with 0.3% hyaluronic acid sodium eye drops and 0.9% normal saline for 20 min of binocular atomization. IPL (SOLARI, Instruments Co., Ltd., Yancheng, China) Lutronic Corporation, Goyang, Korea) was used at filter of 570 n)																			Corneal fluorescein staining (CFS)	Mean change (SD)	Slit-lamp examination with fluorescein dye	3-4 weeks post final session		Pre-treatment: 1.42 ¬± 2.45 Post-treatment: 0.45 ¬± 1.03 P=0.003
Totuk 2021	Efficacy of intense pulsed light treatment for moderate to severe acute blepharitis or blepharoconjunctivitis: A retrospective case series	√ñzg√ºn Melike Gedar Totuk	Turkey and Cyprus	2021	none	To evaluate the efficacy of periocular intense pulsed light (IPL) therapy in the treatment of moderate to severe acute blepharitis or blepharoconjunctivitis.	Case series		11 patients (22 eyes)	11 patients (22 eyes)	Moderate to severe acute blepharitis or blepharoconjunctivitis	Lid disease	Hospital	17-77 years	IPL	E>Eye (ESwin, Paris, France)	580‚Äì1200 nm	9.8‚Äì13 J/cm¬≤		Pulsed light	4 flashes of light immediately below lower eyelid.	Baseline, 2 weeks and 6 weeks	Patients also received warm compresses, eyelid massage, lid hygiene, azithromycin 1% drops, and dexamethasone 0.05% drops																			Ocular Surface Disease Index (OSDI)	Mean (SD)	Standardized self-administered 12-item questionnaire	10 weeks		Baseline: 29.73 ¬± 4.58 10 weeks: 12.36 ¬± 1.40 p < 0.0001
Stonecipher 2019	Low level light therapy for the treatment of recalcitrant chalazia: A sample case summary	Karl Stonecipher	USA	2019	Funded by Physicians Protocol Dr. Stonecipher: Consultant to multiple industry partners (e.g., Espansione, Alcon, Allergan) Dr. Potvin: Received personal fees from Physicians Protocol Authors report no other conflicts of interest	To evaluate the effect of low-level light therapy (LLLT) on the resolution of chalazia unresponsive to previous pharmaceutical or surgical treatments	Other: Retrospective case series (chart review)		26 eyes (22 patients)	22 patients (26 eyes)	Recalcitrant chalazia	Lid disease	Hospital	4-93 years	LLLT	Eye-light¬Æ Treatment mask	633 +/- 10 nm	100 mW/cm¬≤		Continuous	15 minute	One per treatment session (second treatment optionally repeated 24 hrs to 2 months later)	Combined with antibiotic/steroid drops for 2 weeks; adults also received doxycycline 100 mg BID orally; no systemic therapy in pediatric patients																			Resolution of chalazion	Proportions and qualitative chart review	Clinical observation	Up to 2 months post-treatment		Resolution after 1 treatment: 46% (12/26 eyes) Resolution after 2 treatments: 92% (24/26 eyes) Time to resolution ranged from 3 days to 1 month
Qiao 2021	Adverse Events of Intense Pulsed Light Combined With Meibomian Gland Expression Versus Meibomian Gland Expression in the Treatment of Meibomian Gland Dysfunction	Chen Qiao	China	2018-2019	Funded by Youth Projects of Health and Family Planning Commission of Wuhan Municipality (WX18Q46) Projects of Aier Eye Group (AR1904D2) Authors declared no conflicts of interest	To analyze the occurrence and causes of adverse events in IPL-MGX versus MGX treatment for meibomian gland dysfunction (MGD)	Other: Retrospective study	2018-2019	3,689 (2,282 IPL-MGX, 1,407 MGX)		Meibomian gland dysfunction Patients younger than 20 years who received IPL‚ÄêMGX treatment mostly suffered from blepharokeratoconjunctivitis (BKC).	Lid disease	Hospital	9-92 (176pts aged 9-20)	Intense Pulsed Light (IPL) + Meibomian Gland Expression (MGX)	SOLARI (Lutronic Corp, Korea); Couplant SUWEN-B	500-1200nm	9‚Äì13 J/cm¬≤		Intense Pulsed Light (non-laser polychromatic)	~10‚Äì15 light pulses per treatment area	1 session per 2‚Äì3 weeks, up to 10 sessions	Couplants and cooling applied; protective shields used for eyes	Meibomian Gland Expression (MGX)							Weekly, up to 35 sessions	team eye masks used for warm compress										Adverse event incidence	Count and percentage	Clinical observation + slit-lamp exam	During and up to 1 month post-treatment		74/2282 patients (3.24%)	27/1407 patients (1.92%)
Jiang 2024	Therapeutic effect of intense pulsed light on different types of chalazion in children	Jiao Jiang	China	2024	Hebei Province medical science research project	To investigate the effectiveness of Intense Pulsed Light (IPL) therapy for chalazion treatment while exploring potential variations in sensitivity among different types of chalazion.	Randomised controlled trial	44348	149	149	Chalazion	Lid disease	Hospital	0-7	tobramycin eye drops combined with IPL treatment,	EYESIS light pulse MOPT treatment instrument for meibomian gland dysfunction (MDC	500-1200nm	8- 12 J/cm2		Pulsed	5 irradiations per eye, once per week		IPL energy ranged from 8 to 12 J/cm¬≤, adjusted based on individual tolerance.											Tobramycin eye drops (3 times daily) + local hot compress (38‚Äì42¬∞C) twice daily for 5‚Äì10 minutes.								Reduction in chalazion size after treatment	Mean diameter pre- and post-treatment	Color Doppler ultrasound	3 weeks	Cured (100% reduction) 5 (6.76%) Effective (‚â•50% reduction) 16 (21.62%) Ineffective (<50% reduction) 53 (71.62%)	17 (22.67%) were cured (the mean diameter measured 4.31¬±1.73 mm prior to treatment and 0¬±0 mm post-treatment), 39 (52.00%) were effective (The mean diameter measured 4.72¬±2.16 mm prior to treatment and 1.84¬±0.83 mm post-treatment), 19 (25.33%) were ineffec- tive (the mean diameter measured 3.92¬±1.68 mm prior to treatment and 4.22¬±1.67 mm post-treatment)
																Hunan EnVan Technology (Head-mounted laser)	650 nm	1
																Chenzhou Eye Care (Leshi Yangguang)	650 ± 10 nm	1
																Desktop light therapy (Vyoptics)	635 nm	1
																Ya Kun Optoelectronic Co., Ltd.	650 ± 10 nm	1
																LONGDA, Jilin	635 nm	1
																Myopia and Amblyopia Treatment Apparatus	650 nm	1
																Most common:
																→ 3 minutes per session
																Others noted:
																→ 3-hour daily session (Tsubota Laboratory VLF device)
																→ 3-minute sessions (repeated twice daily) for nearly all other devices
																→ 2–3 minutes per session for a few (one lists 3 mins, another 2 mins)
																Frequency of Administration:
																Dominant protocol:
																→ Twice daily, minimum 4 hours apart
																→ Found in the majority of Eyerising and similar devices
[truncated: 99 more columns]
